# Supplementary material for: Genetically predicted leucine level mediates association between CD4/CD8br T lymphocytes and insomnia
Source: Research Square preprint supplement (doi:10.21203/rs.3.rs-5243218/v1), 2024-12-10
Supplement: Supplementary file 1 [file 36ed962579bd75c94100e57d.xlsx]

## Sheet: Sheet3
Table s1 The heterogeneity of immunotype instrumental variables and Directional horizontal pleiotropy assessed by intercept term in MR Egger regression of the association between immunotypes and insomnia.
Immunotypes(exposure)	method	Heterogeneity			Horizontal pleiotropy
		Cochran's Q	df	P-value	Egger_intercept	SE	P-value
CD4/CD8br	MR Egger	9.64489	13	0.722683	-0.000387669	0.00113017	0.737067
CD4/CD8br	Inverse variance weighted	9.76255	14	0.779329
CD8br %T cell	MR Egger	20.2916	21	0.502862	0.000306058	0.000911934	0.740491
CD8br %T cell	Inverse variance weighted	20.4043	22	0.557767
CD38 on CD3- CD19-	MR Egger	16.2334	16	0.436791	-0.000149722	0.00128422	0.908639
CD38 on CD3- CD19-	Inverse variance weighted	16.2472	17	0.506381
CD16-CD56 on NKT	MR Egger	39.9661	25	0.0293989	-0.00041784	0.00110557	0.708664
CD16-CD56 on NKT	Inverse variance weighted	40.1945	26	0.0373311
CD25 on CD45RA+ CD4 not Treg	MR Egger	27.6534	19	0.0903294	0.000567276	0.000904425	0.537978
CD25 on CD45RA+ CD4 not Treg	Inverse variance weighted	28.226	20	0.104156
CD40 on monocytes	MR Egger	28.6085	24	0.235212	0.000269225	0.000825748	0.747222
CD40 on monocytes	Inverse variance weighted	28.7352	25	0.275135
CCR2 on myeloid DC	MR Egger	12.7794	10	0.236266	-0.000843785	0.00118171	0.491535
CCR2 on myeloid DC	Inverse variance weighted	13.431	11	0.266091
CD80 on CD62L+ myeloid DC	MR Egger	22.7671	24	0.53358	-7.93772e-05	0.000830547	0.924654
CD80 on CD62L+ myeloid DC	Inverse variance weighted	22.7762	25	0.590629
