# Supplementary material for: Genetically predicted leucine level mediates association between CD4/CD8br T lymphocytes and insomnia
Source: Research Square preprint supplement (doi:10.21203/rs.3.rs-5243218/v1), 2024-12-10
Supplement: Supplementary file 2 [file 5674a8e3d7c9a8c583980173.xlsx]

## Sheet: Sheet3
Table s2 The heterogeneity of immunotype instrumental variables and Directional horizontal pleiotropy assessed by intercept term in MR Egger regression of the association between metabolites and insomnia.
Metabolites(exposure)	method	Heterogeneity			Horizontal pleiotropy
		Cochran's Q	df	P-value	Egger_intercept	SE	P-value
Dodecanedioate levels	MR Egger	27.2184	20	0.129232	0.000546246	0.00148373	0.716624
Dodecanedioate levels	Inverse variance weighted	27.4028	21	0.157915
6-oxopiperidine-2-carboxylate levels	MR Egger	27.0723	22	0.208495	-0.000663592	0.000931876	0.483885
6-oxopiperidine-2-carboxylate levels	Inverse variance weighted	27.6963	23	0.227485
3-amino-2-piperidone levels	MR Egger	22.7905	22	0.41364	-0.00063439	0.00116131	0.590378
3-amino-2-piperidone levels	Inverse variance weighted	23.0996	23	0.454966
3-hydroxy-3-methylglutarate levels	MR Egger	15.8737	18	0.601362	0.00106842	0.00195572	0.591566
3-hydroxy-3-methylglutarate levels	Inverse variance weighted	16.1721	19	0.645764
Cholate levels	MR Egger	13.2571	16	0.653875	-0.000802008	0.00171985	0.647269
Cholate levels	Inverse variance weighted	13.4745	17	0.703884
N-formylmethionine levels	MR Egger	10.1992	19	0.947859	-0.000247301	0.00137412	0.859082
N-formylmethionine levels	Inverse variance weighted	10.2316	20	0.963775
Leucine levels	MR Egger	14.8834	18	0.669961	0.00185044	0.00159846	0.262142
Leucine levels	Inverse variance weighted	16.2235	19	0.642319
Maltose levels in coronary artery disease	MR Egger	12.2337	16	0.727744	0.000136651	0.00130237	0.91774
Maltose levels in coronary artery disease	Inverse variance weighted	12.2447	17	0.7851
X-24736 levels	MR Egger	24.9816	28	0.628838	-0.000767876	0.00122569	0.536071
X-24736 levels	Inverse variance weighted	25.3741	29	0.6587
X-26054 levels	MR Egger	32.6181	28	0.250092	-0.000876226	0.000854675	0.314038
X-26054 levels	Inverse variance weighted	33.8425	29	0.245072
Caffeine to theophylline ratio	MR Egger	16.7741	26	0.91575	0.000258455	0.0012415	0.836711
Caffeine to theophylline ratio	Inverse variance weighted	16.8174	27	0.93553
