# Supplementary material for: Genetically predicted leucine level mediates association between CD4/CD8br T lymphocytes and insomnia
Source: Research Square preprint supplement (doi:10.21203/rs.3.rs-5243218/v1), 2024-12-10
Supplement: Supplementary file 3 [file 64a6825e4b08aeb1261fcf2e.xlsx]

## Sheet: Sheet3
Table s3 The heterogeneity of immunotype instrumental variables and Directional horizontal pleiotropy assessed by intercept term in MR Egger regression of the association between immunotypes and leucine level.
Immunotypes(exposure)	method	Heterogeneity			Horizontal pleiotropy
		Cochran's Q	df	P-value	Egger_intercept	SE	P-value
CD4/CD8br	MR Egger	9.64489	13	0.722683	-0.000387669	0.00113017	0.737067
CD4/CD8br	Inverse variance weighted	9.76255	14	0.779329
